# Supplementary material for: Age-dependent decline in stress response capacity revealed by proteins dynamics analysis
Source: PubMed Central journal article supplement (PMC7494919; doi:10.1038/s41598-020-72167-4), 2020-09-16
Supplement: 41598_2020_72167_MOESM1_ESM.pdf [file 41598_2020_72167_MOESM1_ESM.pdf]

1

## Supplementary information for

2

## Age-dependent decline in stress response capacity revealed by

3

## proteins dynamics analysis

4

Kaiyue Chen<sup>1,2</sup>, Wenting Shen<sup>2</sup>, Zhiwen Zhang<sup>1</sup>, Fangzheng Xiong<sup>1</sup>, Qi Ouyang<sup>1,2,3</sup>, Chunxiong

5

Luo<sup>1,2\*</sup>

6

<sup>1</sup>The State Key Laboratory for Artificial Microstructures and Mesoscopic Physics, School of

7

Physics, Peking University, China. <sup>2</sup>Center for Quantitative Biology, Academy for Advanced

8

Interdisciplinary Studies, Peking University, China. <sup>3</sup>Peking-Tsinghua Center for Life Sciences,

9

Peking University, Beijing, China.

10

\*To whom correspondence should be addressed: Chunxiong Luo, email: pkuluocx@pku.edu.cn

11

12

### Supplementary Figures

13

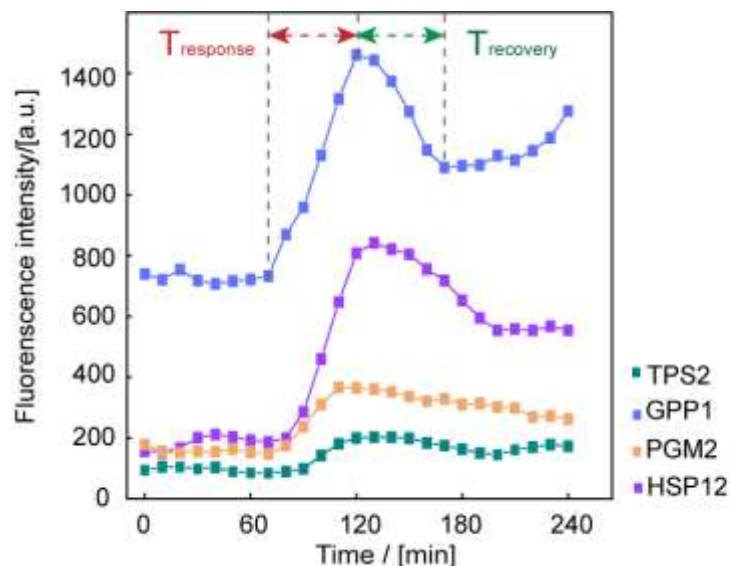

14

15

16

**Supplementary Figure 1. Recovery times of yeasts under stimulation with sustained hyperosmotic pressure (0.4 M KCl).**

17

18

To estimate the response and adaptation time of cells to osmotic stress, we added continuous

19

osmotic pressure (0.4 M KCl) stimulation at 80 min. The response time is the time it takes for the

20

base value to reach the fluorescence maximum. Recovery time is adapted from the maximum to

21

the constant value. The response time and recovery time were approximately 1 h and 2~3 h,

22

respectively.

23

24

25

26

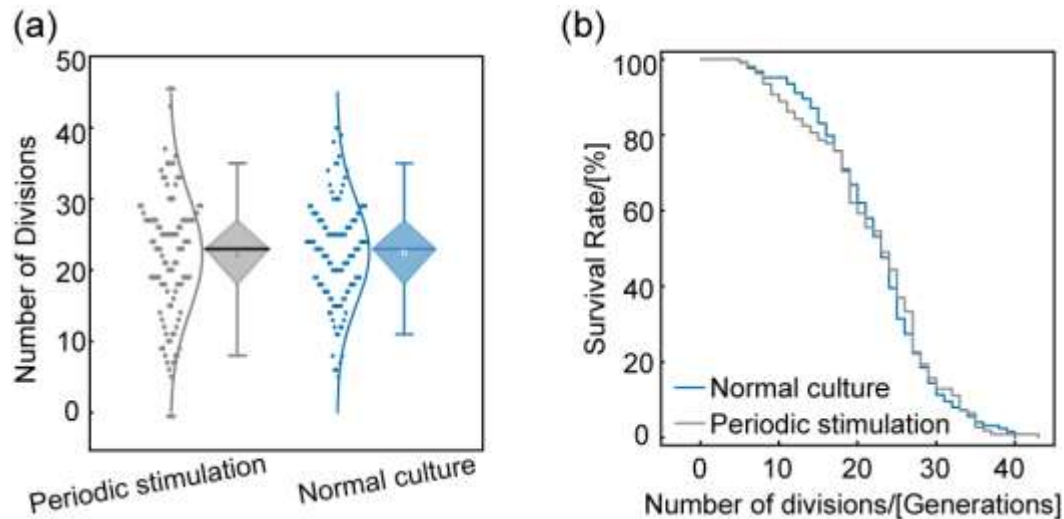

27  
28  
29  
30  
31  
32  
33  
34  
35  
36  
37  
38  
39  
40  
41  
42  
43  
44  
45  
46  
47  
48  
49  
50  
51  
52  
53  
54  
55  
56  
57  
58

**Supplementary Figure 2. Periodic mild osmotic stimulation (0.4 M KCl) does not affect the replicative lifespan of yeast cells.**

(a) The lifespan distribution of yeast cells under normal culture and periodic stimulation conditions. The lifespan under both conditions showed a normal distribution, which is similar to previous conclusions obtained by using manual methods (N=124 and 108 under normal culture and periodic stimulation, respectively).

(b) Survival curves of yeast cells under two culture conditions. The replicative lifespan assay shows that compared to the normally cultured strain, strains that received the indicated stimulus exhibited a slight decrease in the mean number of generations.

59

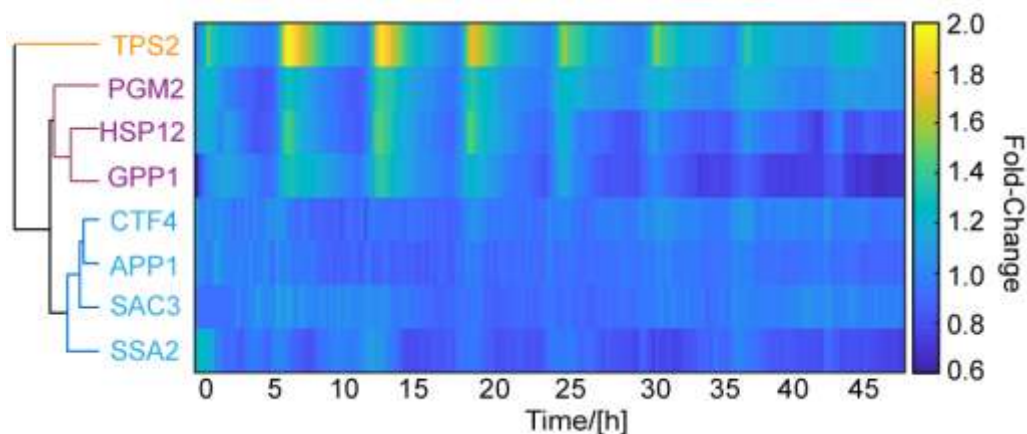

60

61 **Supplementary Figure 3** Heat map depicts representative fold changes in the protein expression of  
62 **components of the HOG1-MAPK pathway and housekeeping genes.**

63 The colored bar represents the fold change in protein expression. Different categories are indicated with different  
64 colors. Osmotic-related proteins are marked in orange and purple, and the proteins independent of osmotic stress  
65 are in cyan.

66

67

68

69

70

71

72

73

74

75

76

77

78

79

80

81

82

83

84

85

86

87

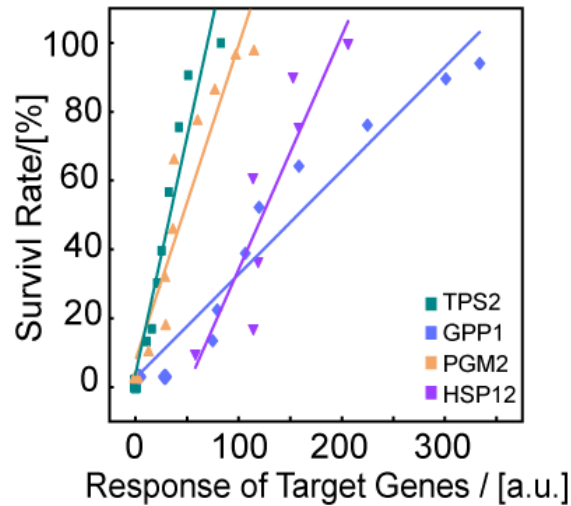

88

89

90 **Supplementary Figure 4. Correlation analysis revealed a linear correlation between**  
 91 **averaged stress responses.**

92 For the four osmotic-related proteins, we performed a correlation analysis of the descending  
 93 segments of the response curve and the survival curve. Correlation analysis revealed a linear  
 94 correlation of higher than 80% on average between stress response and survival rate with the  
 95 highest correlation coefficient of 93% in TPS2.

96

97

98

99

100

101

102

103

104

105

106

107

108

109

110

111

112

113

114

115

116

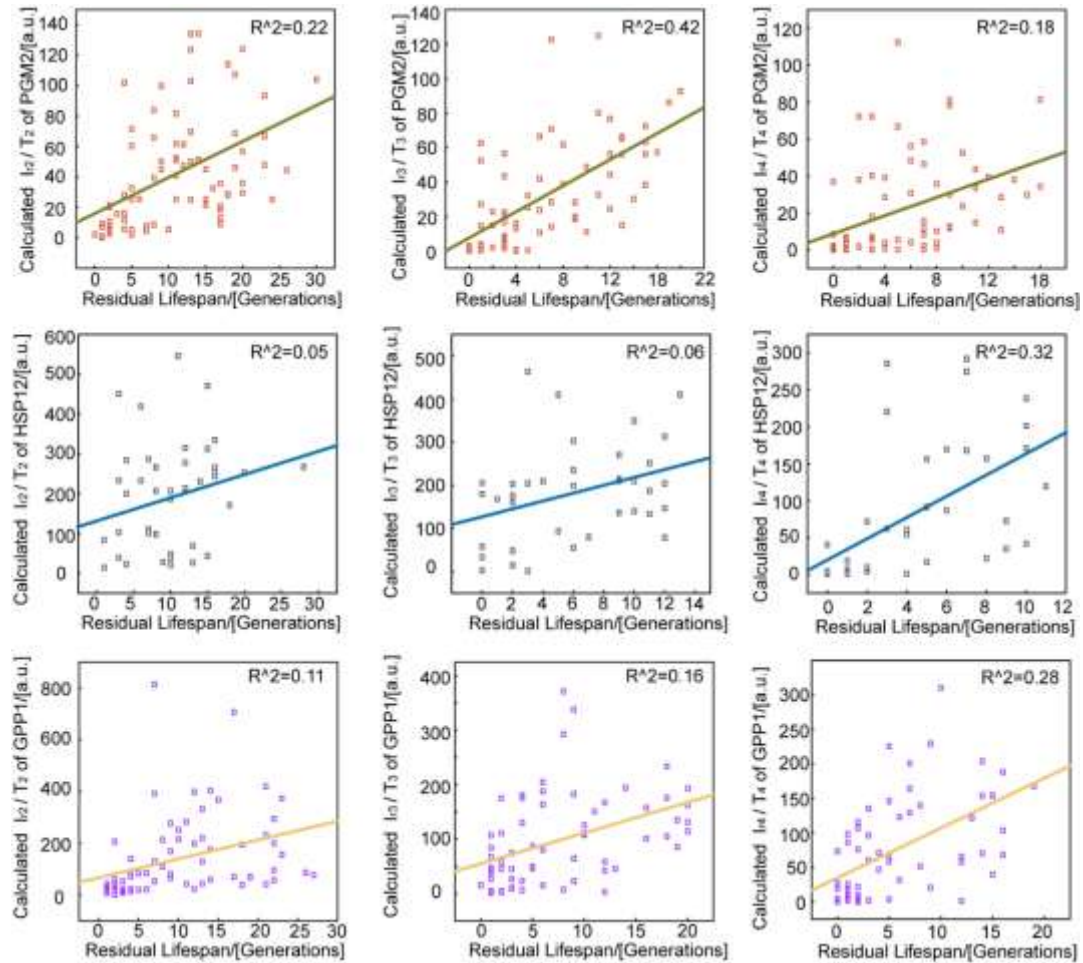

117

118

119 **Supplementary Figure 5. Lifespan predictability of osmotic-related proteins.**

120 We analyzed the relationship between the response capability of the four proteins to a single  
 121 stimulus and the residual lifespan. Consistent with clustering results, TPS2 has the best lifespan in  
 122 single-cell level ( $R^2=0.58$ , Fig. 4a), followed by PGM2 ( $R^2=0.42$ ).

123

124

125

126

127

128

129

130

131

132

133

134

135

136

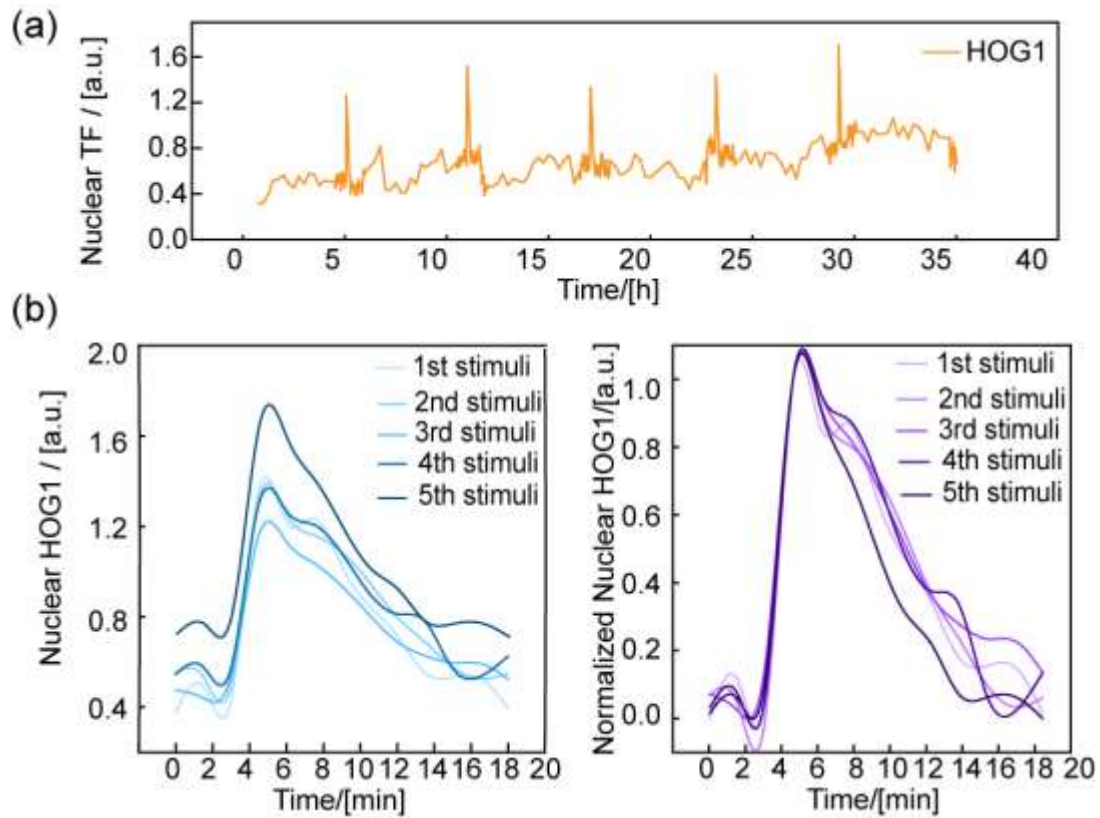

137  
 138  
 139  
 140  
 141  
 142  
 143  
 144  
 145  
 146  
 147  
 148  
 149  
 150  
 151  
 152  
 153  
 154  
 155  
 156  
 157  
 158  
 159

**Supplementary Figure 6. Nuclear localization and duration analysis during aging at the single-cell level.**

For single-cell data as an example (a), the fluorescent intensity and normalized nuclear HOG1 was demonstrated at each administered stimulation (b).

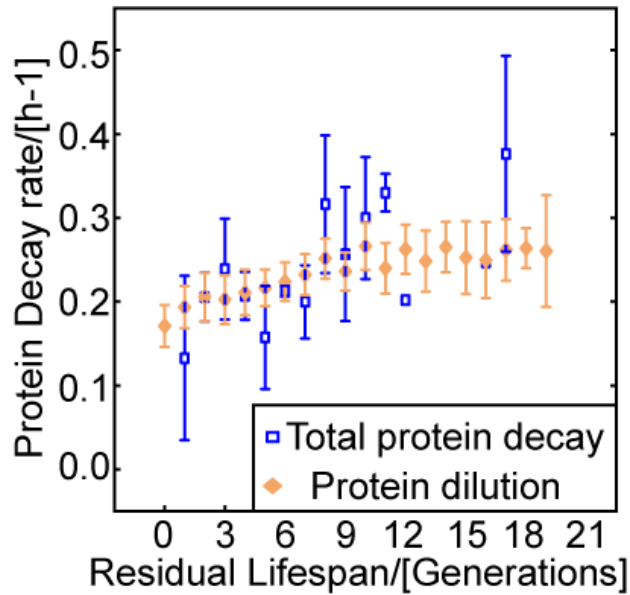

160  
 161  
 162  
 163  
 164  
 165  
 166  
 167  
 168  
 169  
 170  
 171  
 172  
 173  
 174  
 175  
 176  
 177  
 178  
 179  
 180  
 181  
 182  
 183  
 184  
 185  
 186  
 187

**Supplementary Figure 7. Dynamic changes in protein dilution and degradation during the aging process.**

We used single-cell data for parameter fitting to obtain the relationship between the decay coefficient of the target protein  $d_2$  and residual generations ( $N=39$ ). According to Equation (6), we quantitatively measured the protein dilution caused by cell division. Through the above analysis, we deduced the effect of molecular degradation on the remaining lifespan. Although the single-cell data are relatively messy, the degradation ability of the cells was significantly reduced in the generations before death.

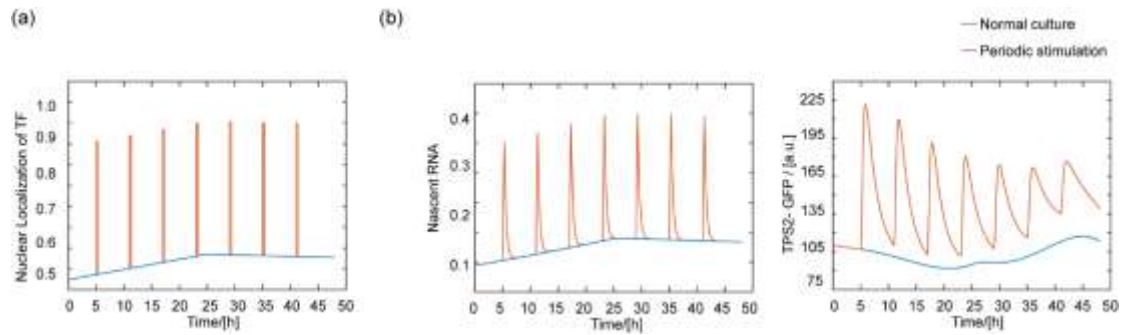

188  
 189  
 190  
 191  
 192  
 193  
 194  
 195  
 196  
 197  
 198  
 199  
 200  
 201  
 202  
 203  
 204  
 205  
 206  
 207  
 208  
 209  
 210  
 211  
 212  
 213  
 214  
 215  
 216  
 217  
 218  
 219  
 220  
 221  
 222  
 223

**Supplementary Figure 8. Simulated time traces of mRNA and protein from different TF inputs.**

(a) curve fitting of averaged transcription factor(TF) localization time trace throughout the whole lifespan.

(b) Simulations of mRNA and downstream protein expression in response to two different transcription factor(TF) inputs (orange solid line: periodic stimulation; blue solid line: normal culture).



224 **Supplementary Table 1. Performance comparison of different abundance**  
 225 **proteins.**

|                                                                      | <b>TPS2</b> | <b>PGM2</b> | <b>HSP12</b> | <b>GPP1</b> | <b>CTF4</b> | <b>APP1</b> | <b>SAC3</b> | <b>SSA2</b> |
|----------------------------------------------------------------------|-------------|-------------|--------------|-------------|-------------|-------------|-------------|-------------|
| copy numbers (untreated)<br>( From Yeastgenome.org )                 | 15818       | 40334       | 42197        | 221168      | 5044        | 1530        | 1677        | 411582      |
| copy numbers (under stress)<br>( From Yeastgenome.org )              | 31452       | 66625       | 84487        | 344606      | NA          | NA          | NA          | NA          |
| Basic fluorescent value<br>$I_0$ / [a.u.](Untreated)                 | ≈ 100       | ≈ 200       | ≈ 200        | ≈500        | ≈ 40        | ≈ 30        | ≈ 30        | ≈ 1000      |
| Maximum fluorescent value under<br>osmotic-stress $I_{max}$ / [a.u.] | ≈ 220       | ≈ 300       | ≈ 400        | ≈700        | ≈ 45        | ≈ 40        | ≈ 40        | ≈ 1100      |
| Maximum synthesis rate $\alpha_{max}$ ([a.u.]/h)                     | ≈ 180       | ≈ 220       | ≈ 330        | ≈500        | ≈ 35        | ≈ 30        | ≈ 30        | ≈ 750       |
| Averaged synthesis rate $\alpha_0$ ([a.u.]/h)                        | ≈ 80        | ≈ 170       | ≈ 170        | ≈350        | ≈ 30        | ≈ 25        | ≈ 25        | ≈ 700       |

226

227 NA means not analysed

228  $I_0$  and  $I_{max}$  are the results of our experiments.

229  $\alpha_{max}$  and  $\alpha_0$  are calculated by the Euler equation<sup>1</sup>.

230

231

232

233

234

235

236

237

238 **Computational modeling:**

239 In this phenomenological model, the binding of transcription factor immediately induces mRNA  
 240 production, which then leads to the production of downstream protein<sup>2</sup>. The equations describing  
 241 the system as follows:

242

$$TF(t) = \begin{cases} TF_0, t > \Delta t \\ TF', 0 < t < \Delta t \end{cases}$$

$$\frac{d[mRNA]}{dt} = \frac{k_1 \cdot TF(t)^n}{K_d^n + TF(t)^n} - d_1 * [mRNA]$$

$$\frac{dP(t)}{dt} = k_2[mRNA] - d_2 * P(t)$$

243  $k_1$  and  $k_2$  are the production rate of mRNA and protein;  $d_1$  and  $d_2$  are the mRNA and protein  
 244 decay rates (degradation and dilution rate), respectively. The binding of transcription factor to  
 245 DNA is governed by the Hill function, where  $K_d$  is the dissociation constant and  $n$  is the Hill

246 coefficient.  $\Delta t$  is the nuclear localization time of transcription factor.  
 247 Then, we can get the function of mRNA  $m(t)$  and protein  $P(t)$  through the ODE equations.  
 248

$$m(t) = \begin{cases} \frac{A}{d_1} (e^{d_1 t} - 1) e^{-d_1 t}, & 0 < t < \Delta t \\ \frac{A}{d_1} (e^{d_1 \Delta t} - 1) e^{-d_1 t}, & t > \Delta t \end{cases}$$

$$P(t) = \begin{cases} \frac{k_2 A}{d_2 - d_1} \left( \frac{1 - e^{-d_1 t}}{d_1} - \frac{1 - e^{-d_2 t}}{d_2} \right), & 0 < t < \Delta t \\ \frac{k_2 A}{d_2 - d_1} \left( \frac{e^{-d_1 t} (e^{d_1 \Delta t} - 1)}{d_1} - \frac{e^{-d_2 t} (e^{d_2 \Delta t} - 1)}{d_2} \right), & t > \Delta t \end{cases}$$

249

$$A = k_1 \left( \frac{TF'^n}{K_d^n + TF'^n} - \frac{TF_0^n}{K_d^n + TF_0^n} \right)$$

250

251

252 We fitted the averaged protein and mRNA with the function  $m(t)$  and  $P(t)$ . The parameter sets  
 253 selected from the fitting are those that gave the smallest sum of squared residual (ssq)  
 254 (Supplementary Table 2).

255

256 **Supplementary Table 2. Parameter setting**

257

|            |                          |
|------------|--------------------------|
| $k_1$      | 3.021 (h <sup>-1</sup> ) |
| $d_1$      | 3.0 (h <sup>-1</sup> )   |
| $K_d$      | 0.9232 (AU)              |
| $n$        | 4                        |
| $\Delta t$ | 19 min                   |

258

259 In order to verify the accuracy of the model, we fitted the time-series data of TF as input  
 260 (Supplementary Fig. 8 a), and simulated the expression of mRNA and protein under given inputs  
 261 (Supplementary Fig. 8 b). As shown in (Fig. 4c), the base value of transcription factors rises in the  
 262 early lifespan and then flattens out, but the square pulses (above baseline) activated by osmotic  
 263 stress does not change. For the two different transcription factor inputs (normal culture and  
 264 periodic stimulation), the simulated protein dynamics trend is highly consistent with the  
 265 experimental data.

266

267

268

269

270

271 **Reference:**

272 1. Zuleta IA, Aranda-Diaz A, Li H, El-Samad H. Dynamic characterization of growth and gene  
273 expression using high-throughput automated flow cytometry. *Nat Methods* **11**, 443-448  
274 (2014).

275

276 2. Hao N, O'Shea EK. Signal-dependent dynamics of transcription factor translocation controls  
277 gene expression. *Nat Struct Mol Biol* **19**, 31-39 (2011).

278

279
